# Supplementary figures and images for: Co speciation in blue decorations of blue-and-white porcelains from Jingdezhen kiln by using XAFS spectroscopy
Source: Royal Society of Chemistry journal article supplement (doi:10.1039/c0ja00240b), 2011-01-01

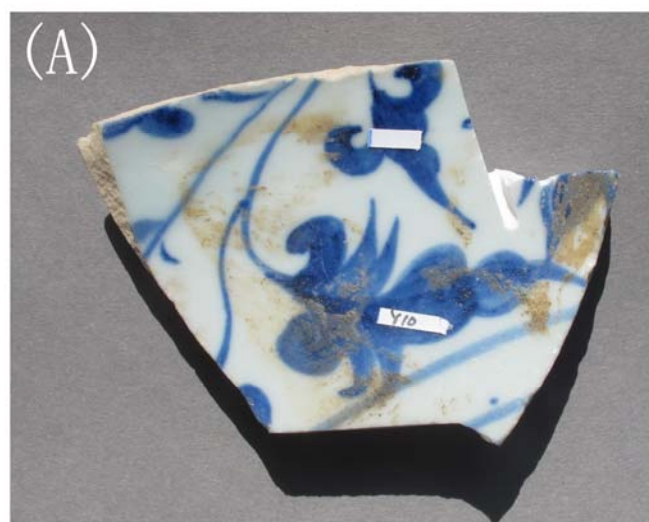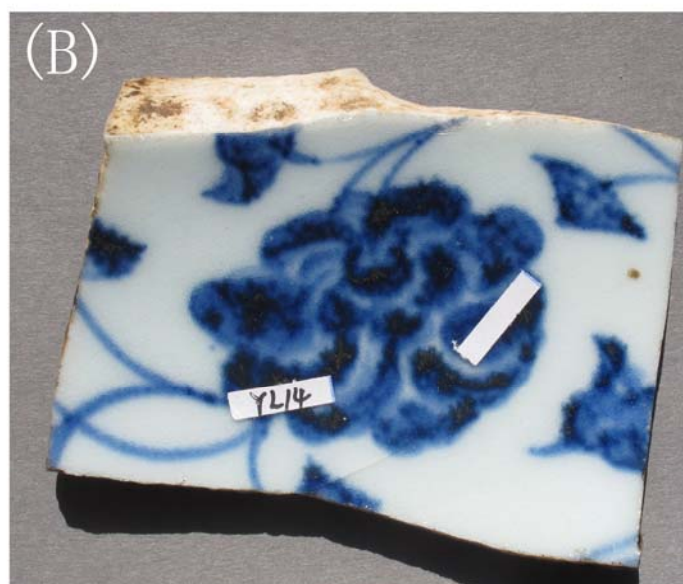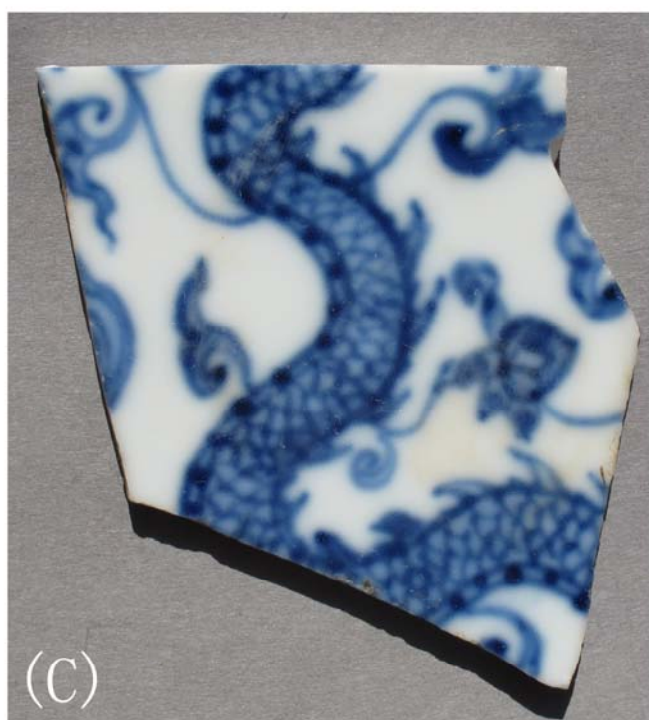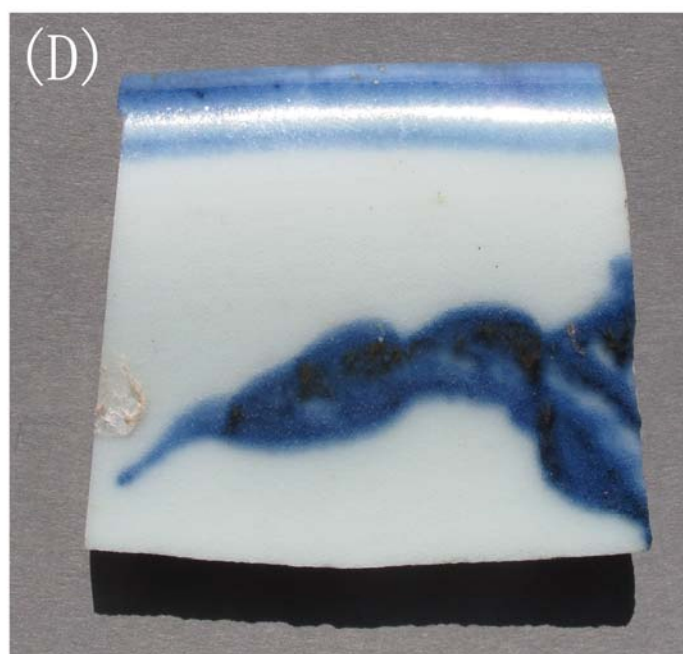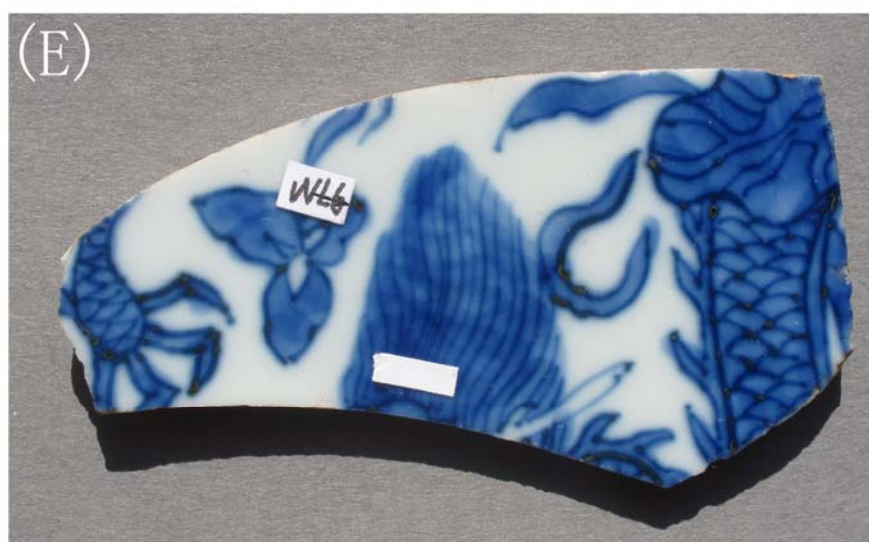

Supplement: c0ja00240b.pdf [file c0ja00240b.pdf]
